# Supplementary material for: The first “Kuhn verdazyl” ligand and comparative studies of its PdCl2 complex with analogous 6-oxoverdazyl ligands
Source: Royal Society of Chemistry journal article supplement (doi:10.1039/c3dt52191e), 2013-01-01
Supplement: c3dt52191e.pdf [file c3dt52191e.pdf]

# The first “Kuhn verdazyl” ligand and comparative studies of its PdCl<sub>2</sub> complex with analogous 6-oxoverdazyl ligands

Cooper W. Johnston, Stephen D.J. McKinnon,<sup>†</sup> Brian O. Patrick,<sup>‡</sup> and Robin G. Hicks<sup>\*†</sup>

## Supporting information

NMR spectra page S2

Electrochemical data (expanded) page S8

Figure S1.  $^1\text{H}$  NMR of **4**.

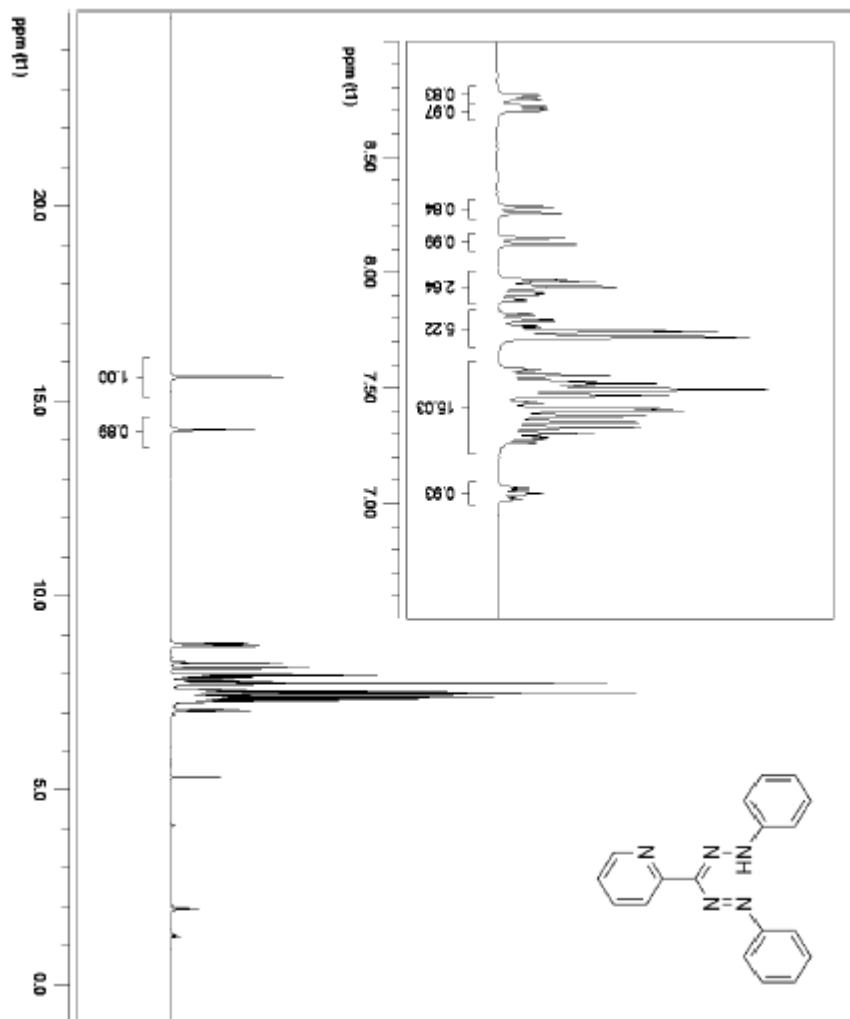

Figure S2.  $^{13}\text{C}$  NMR of **4**.

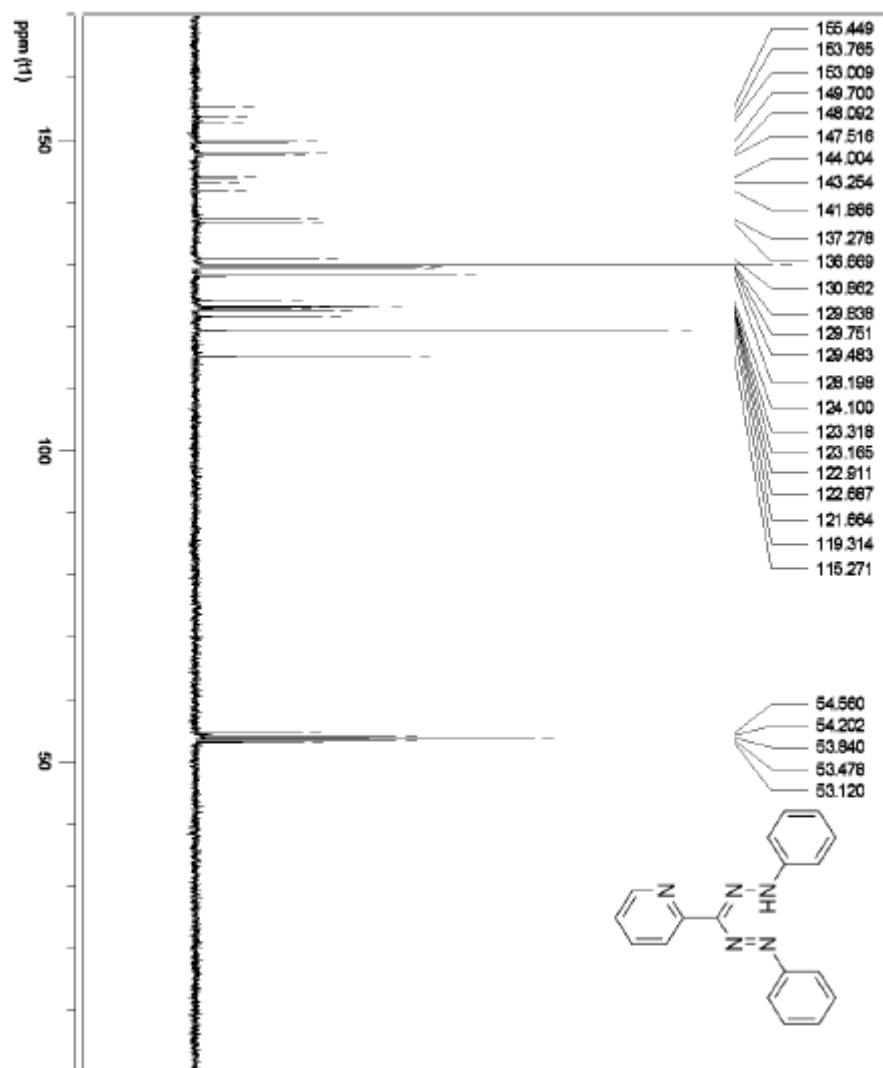

Figure S3.  $^1\text{H}$  NMR of **6**.

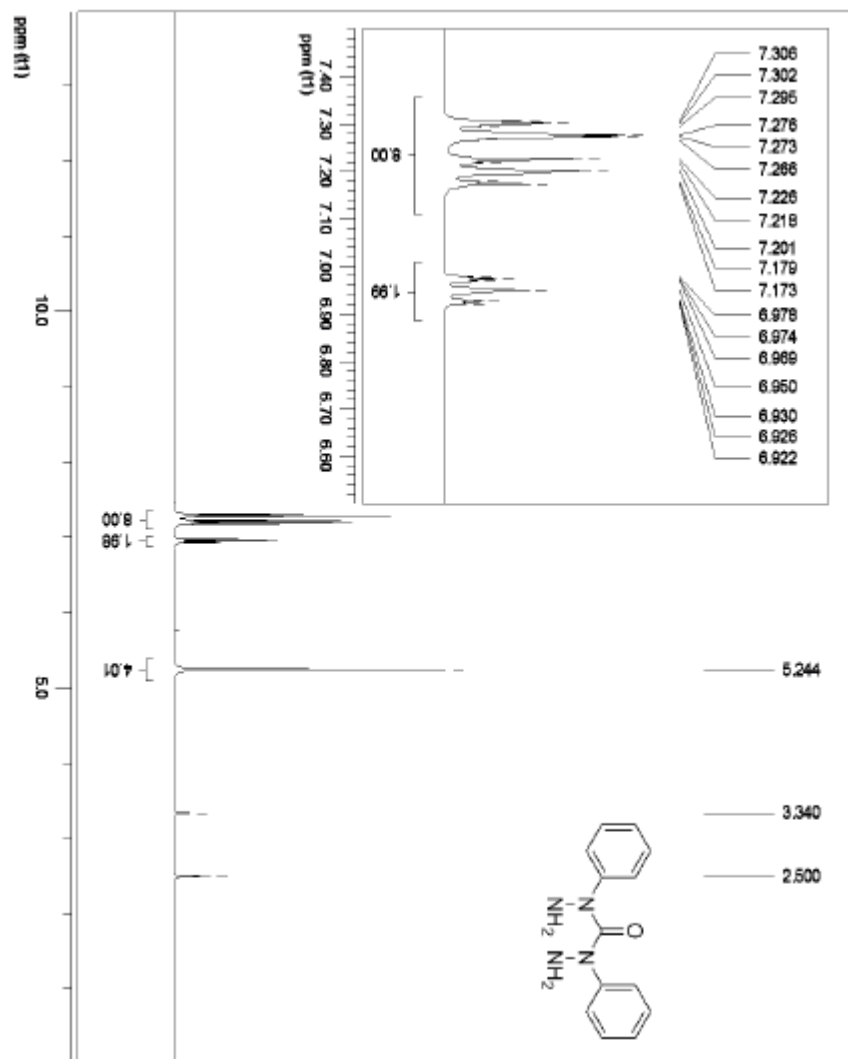

Figure S4.  $^{13}\text{C}$  NMR of 6.

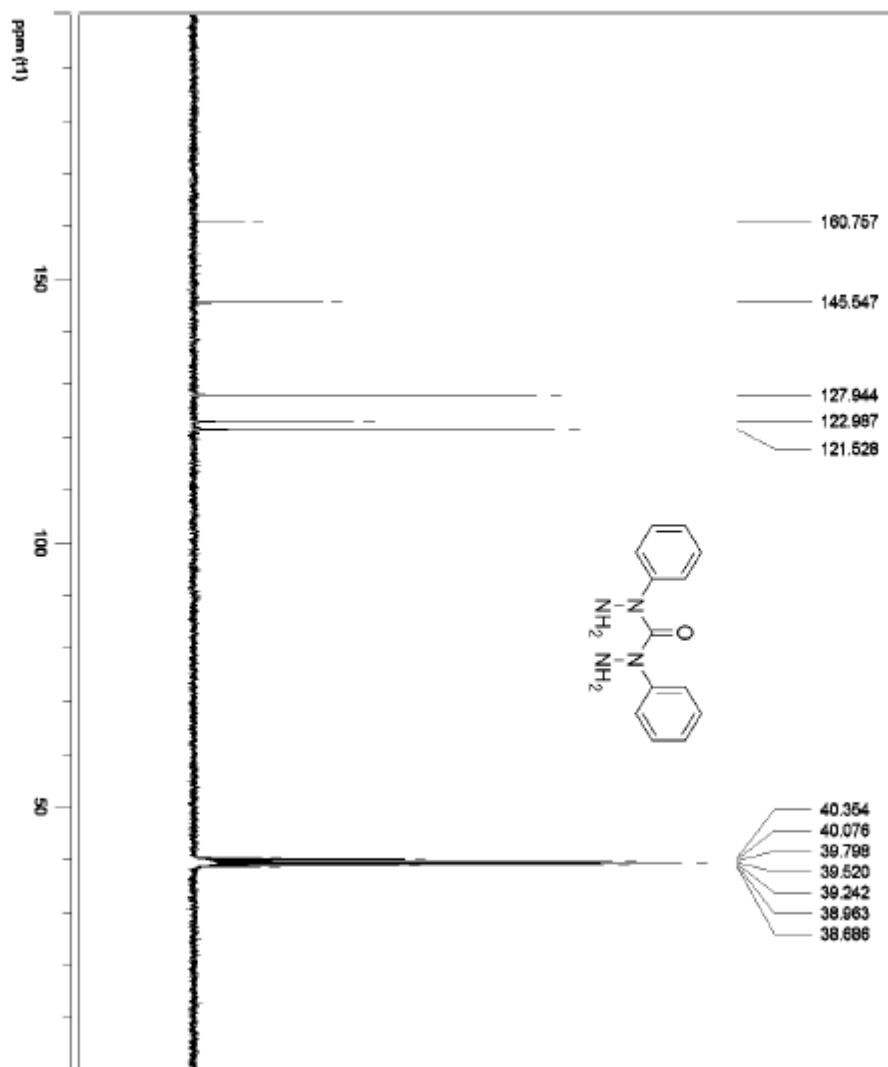

Figure S5.  $^1\text{H}$  NMR of **7**.

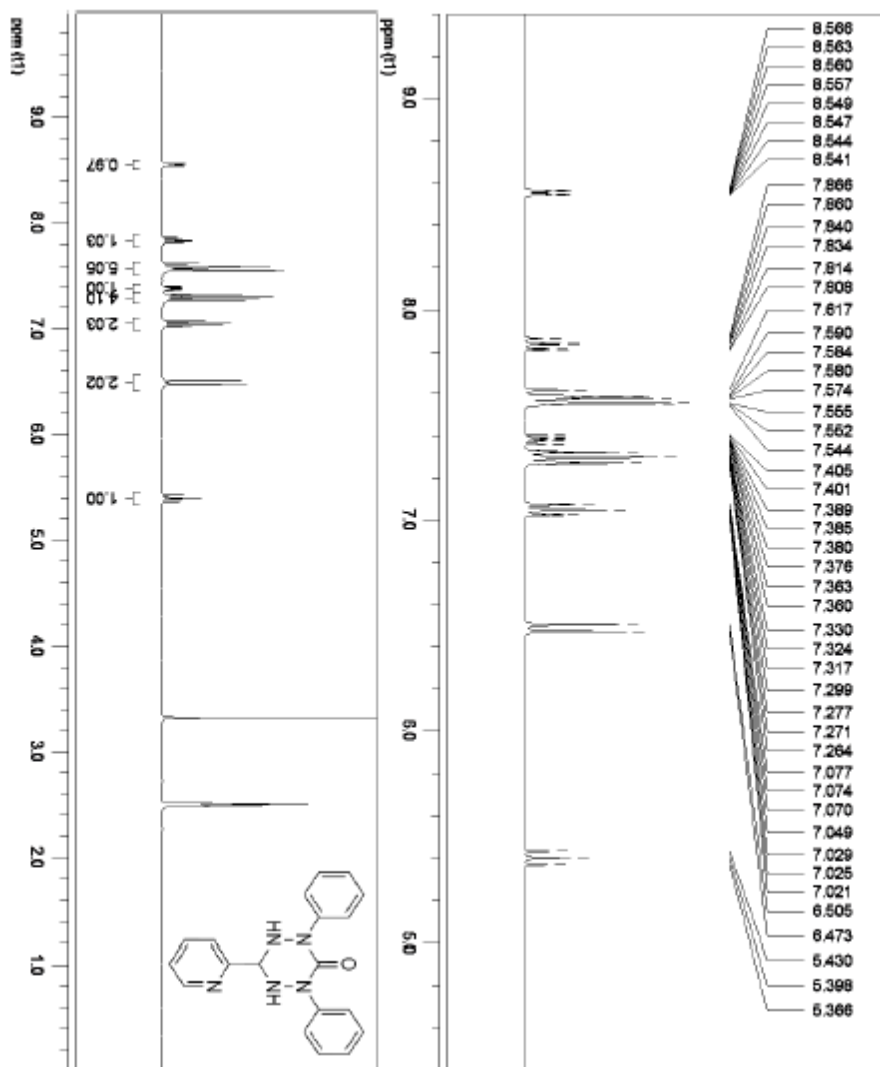

Figure S6.  $^{13}\text{C}$  NMR of **7**.

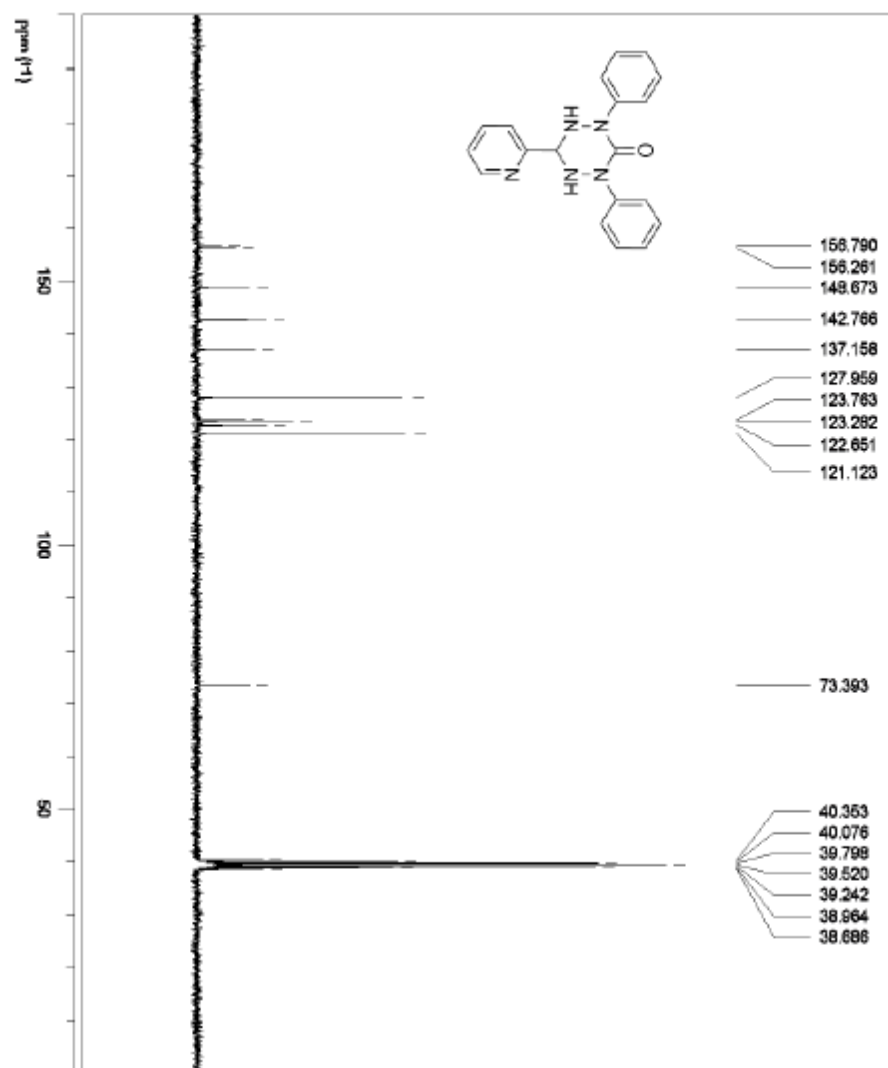

Table S1. Electrochemical data

**Table 3.** Electrochemical data. Potentials are in V vs.  $\text{Fc}^+/\text{Fc}$  in  $\text{CH}_2\text{Cl}_2$  solution, cell potentials in V except for  $\Delta E_p$  in mV

| Cpd.                       | reduction                    |                              |                            |                          | oxidation                    |                              |                    |                         | $E_{\text{cell}}$ |
|----------------------------|------------------------------|------------------------------|----------------------------|--------------------------|------------------------------|------------------------------|--------------------|-------------------------|-------------------|
|                            | $E_{\text{c}}^{\text{p}(1)}$ | $E_{\text{c}}^{\text{a}(2)}$ | $\Delta E_p^{(3)}$<br>(mV) | $E_{\text{red}}^{\circ}$ | $E_{\text{c}}^{\text{p}(1)}$ | $E_{\text{c}}^{\text{a}(2)}$ | $\Delta E_p^{(3)}$ | $E_{\text{ox}}^{\circ}$ |                   |
| <b>1a</b>                  | -1.401                       | -1.341                       | 70                         | -1.37                    | +0.171                       | +0.229                       | 58                 | +0.20                   | 1.57              |
| <b>1a.PdCl<sub>2</sub></b> | -0.469                       | -0.409                       | 60                         | -0.44                    | -                            | +0.67                        | -                  | +0.67 <sup>a</sup>      | 1.11 <sup>b</sup> |
| <b>2a</b>                  | -1.044                       | -0.965                       | 79                         | -1.00                    | +0.438                       | +0.511                       | 73                 | +0.47                   | 1.47              |
| <b>2a.PdCl<sub>2</sub></b> | -0.190                       | -0.130                       | 60                         | -0.16                    | +0.781                       | +0.842                       | 61                 | +0.81                   | 0.97              |
| <b>3a</b>                  | -1.329                       | -1.265                       | 64                         | -1.30                    | -0.256                       | -0.190                       | 66                 | -0.22                   | 1.08              |
| <b>3a.PdCl<sub>2</sub></b> | -0.439                       | -0.379                       | 60                         | -0.41                    | +0.386                       | +0.447                       | 61                 | +0.42                   | 0.83              |

(1) cathodic peak potential

(2) anodic peak potential

(3) difference between anodic & cathodic peak potentials

<sup>a</sup>irreversible process; anodic peak potential given

<sup>b</sup> $E_{\text{cell}}$  calculated using anodic peak potential
